# Supplementary material for: Extraction, Identification, and In Vitro Anti-Inflammatory Activity of Feruloylated Oligosaccharides from Baijiu Distillers’ Grains
Source: MDPI journal article supplement (doi:10.3390/foods13081283), 2024-04-22
Supplement: s1 [file s1]

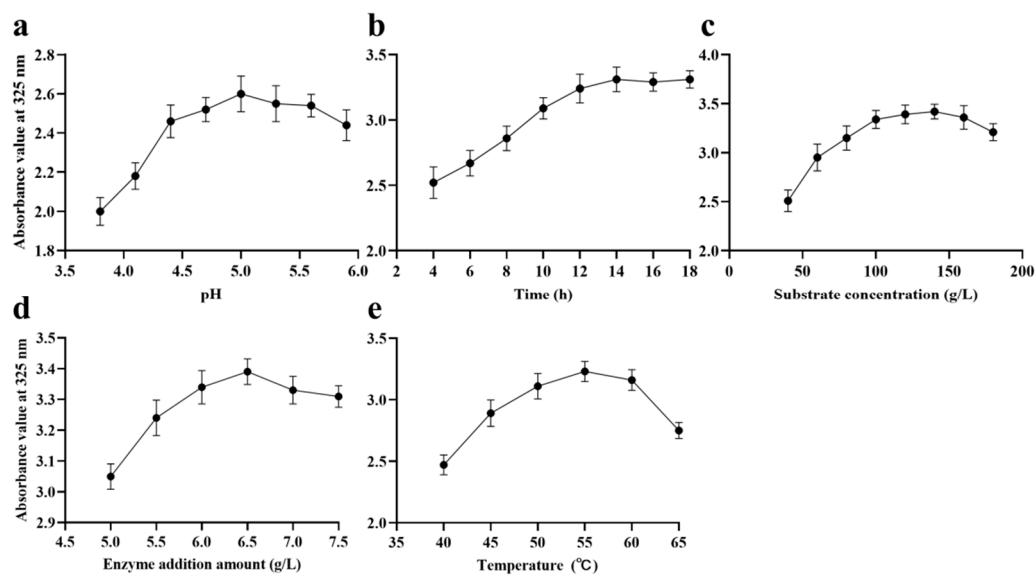

**Supplementary Figure S1.** Results of five single factor experiments. (a) pH; (b) time; (c), substrate concentration; (d) enzyme addition amount; (e) temperature.

**Supplementary Table S1.** Standard curve of mixed monosaccharide standards.

| Monosaccharides       | Regression equation | Linear range (ug/mL) | R <sup>2</sup> | LOD (ug/mL) | LOQ (ug/mL) |
|-----------------------|---------------------|----------------------|----------------|-------------|-------------|
| Mannose               | y=30.137x+4932      | 0.2 - 500.0          | 0.9924         | 0.04        | 0.15        |
| Ribose                | y=31.156x+2605      | 0.2 - 500.0          | 0.9949         | 0.16        | 0.44        |
| Rhamnose              | y=18.221x+1836      | 0.2 - 500.0          | 0.9915         | 0.09        | 0.36        |
| Glucuronic acid       | y=23.062x+2958      | 0.2 - 500.0          | 0.9992         | 0.05        | 0.21        |
| Galacturonic acid     | y=24.271x+13923     | 0.2 - 500.0          | 0.9963         | 0.14        | 0.41        |
| N-acetylglucosamine   | y=19.441x+7826      | 0.2 - 500.0          | 0.9958         | 0.06        | 0.18        |
| Glucose               | y=28.963x+24264     | 0.2 - 500.0          | 0.9991         | 0.02        | 0.11        |
| N-acetylgalactosamine | y=23.713x+15304     | 0.2 - 500.0          | 0.9935         | 0.11        | 0.39        |
| Galactose             | y=35.191x+57034     | 0.2 - 500.0          | 0.9946         | 0.05        | 0.17        |
| Xylose                | y=35.673x+32958     | 0.2 - 500.0          | 0.9961         | 0.08        | 0.28        |
| Arabinose             | y=38.091x+3493      | 0.2 - 500.0          | 0.9982         | 0.13        | 0.42        |
| Fucose                | y=28.085x+24859     | 0.2 - 500.0          | 0.9978         | 0.17        | 0.55        |

**Supplementary Table S2.** Variables and their levels employed in a central composite rotatable design.

| Variable                      | Coded levels |     |     |     |     |
|-------------------------------|--------------|-----|-----|-----|-----|
|                               | -2           | -1  | 0   | 1   | 2   |
| pH                            | 4            | 4.5 | 5   | 5.5 | 6   |
| Temperature (°C)              | 45           | 50  | 55  | 60  | 65  |
| Time (h)                      | 10           | 12  | 14  | 16  | 18  |
| Substrate concentration (g/L) | 80           | 100 | 120 | 140 | 160 |
| Enzyme addition amount (g/L)  | 5.5          | 6   | 6.5 | 7   | 7.5 |

**Supplementary Table S3.** Experimental design matrix and results.

| Run | A:pH | B:Temperature (°C) | C:Time (h) | D:Amount of enzyme (g/L) | E:Concentration of substrate (g/L) | Response: Absorbance value |
|-----|------|--------------------|------------|--------------------------|------------------------------------|----------------------------|
| 1   | 2    | 2                  | 2          | 2                        | 2                                  | 0.2528                     |
| 2   | -2   | 2                  | 2          | 2                        | -2                                 | 0.2162                     |
| 3   | -2   | -2                 | -2         | -2                       | 2                                  | 0.1216                     |
| 4   | 2    | 2                  | -2         | -2                       | 2                                  | 0.1203                     |
| 5   | 0    | 0                  | -4         | 0                        | 0                                  | 0.1851                     |
| 6   | 2    | -2                 | 2          | 2                        | -2                                 | 0.2440                     |
| 7   | 2    | -2                 | 2          | -2                       | 2                                  | 0.1502                     |
| 8   | 0    | 0                  | 0          | 0                        | 0                                  | 0.2702                     |
| 9   | 0    | 4                  | 0          | 0                        | 0                                  | 0.2015                     |
| 10  | 2    | 2                  | -2         | 2                        | -2                                 | 0.0861                     |
| 11  | 0    | 0                  | 0          | -4                       | 0                                  | 0.1189                     |
| 12  | 0    | 0                  | 0          | 0                        | 0                                  | 0.2794                     |
| 13  | -4   | 0                  | 0          | 0                        | 0                                  | 0.1259                     |
| 14  | -2   | 2                  | -2         | 2                        | 2                                  | 0.1474                     |
| 15  | 0    | 0                  | 0          | 0                        | 0                                  | 0.2794                     |
| 16  | 0    | 0                  | 0          | 0                        | 0                                  | 0.2622                     |
| 17  | -2   | -2                 | 2          | -2                       | -2                                 | 0.1138                     |
| 18  | -2   | 2                  | 2          | -2                       | 2                                  | 0.2188                     |
| 19  | -2   | -2                 | 2          | 2                        | 2                                  | 0.1254                     |
| 20  | 2    | 2                  | 2          | -2                       | -2                                 | 0.1283                     |
| 21  | 0    | 0                  | 4          | 0                        | 0                                  | 0.2844                     |
| 22  | 0    | -4                 | 0          | 0                        | 0                                  | 0.1611                     |
| 23  | 0    | 0                  | 0          | 0                        | 0                                  | 0.2861                     |
| 24  | 4    | 0                  | 0          | 0                        | 0                                  | 0.1269                     |
| 25  | -2   | -2                 | -2         | 2                        | -2                                 | 0.1442                     |
| 26  | 0    | 0                  | 0          | 0                        | -4                                 | 0.1386                     |
| 27  | 0    | 0                  | 0          | 4                        | 0                                  | 0.1776                     |
| 28  | 0    | 0                  | 0          | 0                        | 4                                  | 0.1630                     |
| 29  | 2    | -2                 | -2         | 2                        | 2                                  | 0.1566                     |
| 30  | -2   | 2                  | -2         | -2                       | -2                                 | 0.1340                     |
| 31  | 2    | -2                 | -2         | -2                       | -2                                 | 0.1337                     |

**Supplementary Table S4.** ANOVA for reduced quadratic model.

| Source                       | Sum of Squares | df | Mean Square | F-value | p-value  |                 |
|------------------------------|----------------|----|-------------|---------|----------|-----------------|
| Model                        | 0.1128         | 17 | 0.0066      | 42.78   | < 0.0001 | significant     |
| A-pH                         | 0.0001         | 1  | 0.0001      | 0.6105  | 0.4486   |                 |
| B-Temperature                | 0.0017         | 1  | 0.0017      | 10.76   | 0.0060   |                 |
| C-Time                       | 0.0150         | 1  | 0.0150      | 96.43   | < 0.0001 |                 |
| D-Amount of enzyme           | 0.0055         | 1  | 0.0055      | 35.70   | < 0.0001 |                 |
| E-Concentration of substrate | 0.0008         | 1  | 0.0008      | 5.01    | 0.0434   |                 |
| AB                           | 0.0061         | 1  | 0.0061      | 39.59   | < 0.0001 |                 |
| AC                           | 0.0015         | 1  | 0.0015      | 9.89    | 0.0077   |                 |
| AD                           | 0.0017         | 1  | 0.0017      | 11.22   | 0.0052   |                 |
| BC                           | 0.0038         | 1  | 0.0038      | 24.36   | 0.0003   |                 |
| BE                           | 0.0040         | 1  | 0.0040      | 25.55   | 0.0002   |                 |
| CD                           | 0.0027         | 1  | 0.0027      | 17.38   | 0.0011   |                 |
| DE                           | 0.0007         | 1  | 0.0007      | 4.40    | 0.0560   |                 |
| A <sup>2</sup>               | 0.0336         | 1  | 0.0336      | 216.34  | < 0.0001 |                 |
| B <sup>2</sup>               | 0.0122         | 1  | 0.0122      | 78.47   | < 0.0001 |                 |
| C <sup>2</sup>               | 0.0015         | 1  | 0.0015      | 9.98    | 0.0075   |                 |
| D <sup>2</sup>               | 0.0238         | 1  | 0.0238      | 153.30  | < 0.0001 |                 |
| E <sup>2</sup>               | 0.0228         | 1  | 0.0228      | 146.73  | < 0.0001 |                 |
| Residual                     | 0.0020         | 13 | 0.0002      |         |          | not significant |
| Lack of Fit                  | 0.0017         | 9  | 0.0002      | 2.13    | 0.2425   |                 |
| Pure Error                   | 0.0003         | 4  | 0.0001      |         |          |                 |
| Cor Total                    | 0.1148         | 30 |             |         |          |                 |
